# Supplementary material for: An in silico osmotic pressure approach allows characterization of pressure–area isotherms of lipid monolayers at low molecular areas
Source: Royal Society of Chemistry journal article supplement (doi:10.1039/d2sm01419j), 2023-01-01
Supplement: d2sm01419j1.pdf [file d2sm01419j1.pdf]

**Supporting Information for**  
**An in silico osmotic pressure approach allows to characterize pressure-area**  
**isotherms of lipid monolayers at low molecular areas**

Janak Prabhu<sup>#</sup>, Akhil Pratap Singh<sup>#</sup> and Stefano Vanni<sup>\*</sup>

Chemin du Musée 10, Department of Biology, University of Fribourg, Switzerland

Phone: +41-26-300-8896. E-mail: stefano.vanni@unifr.ch

<sup>#</sup>J.P. and A.P.S. contributed equally to this work and share first authorship.

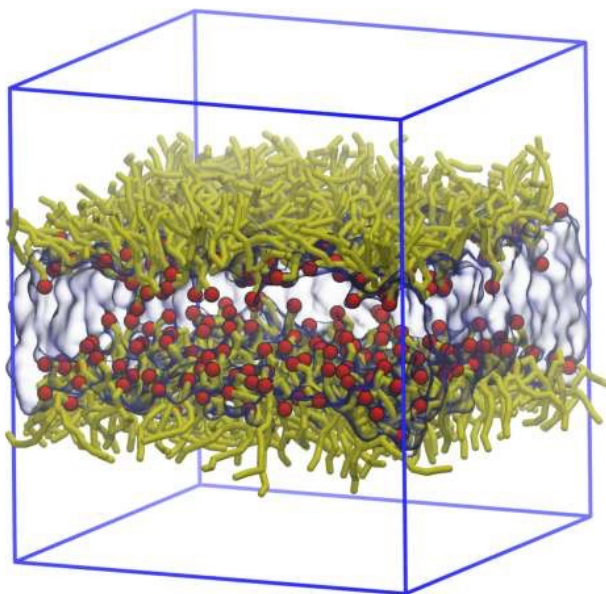

Figure S1. Snapshot of the simulation box for POPC-lipid monolayer. Color scheme: red for lipid head groups, yellow for lipid tails, and ice blue for water

## POPC 298K

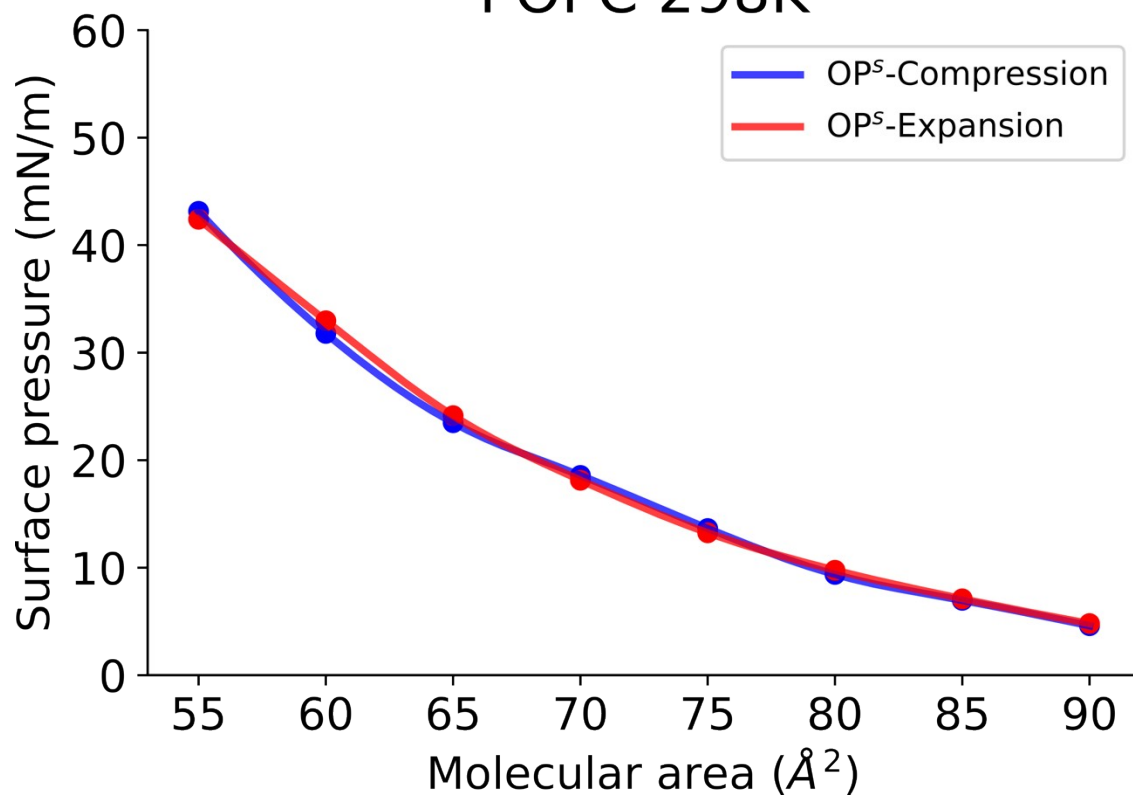

Figure S2. Surface pressure-molecular area isotherms of CG POPC lipids monolayer on aqueous sub-phase at 298 K for different schemes.

(A)

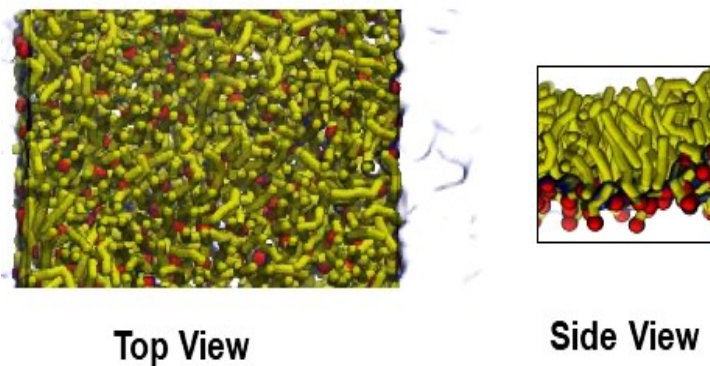

(B)

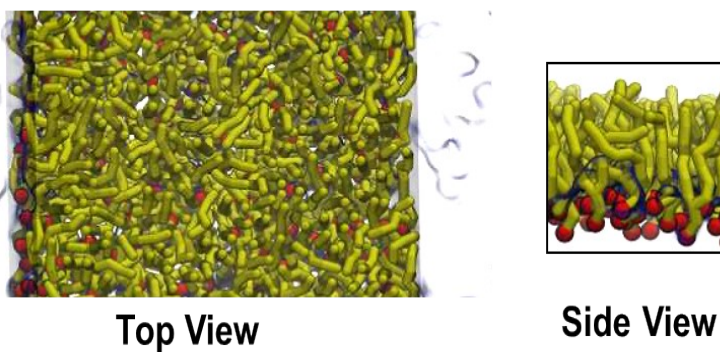

Figure S3. MD Snapshots from simulations using the osmotic pressure method, top and side views, show the liquid-expanded ( $L_E$ ) phases in (A) POPC and (B) DOPC-lipid monolayers. Color scheme: red for lipid head groups and yellow for lipid's tails.

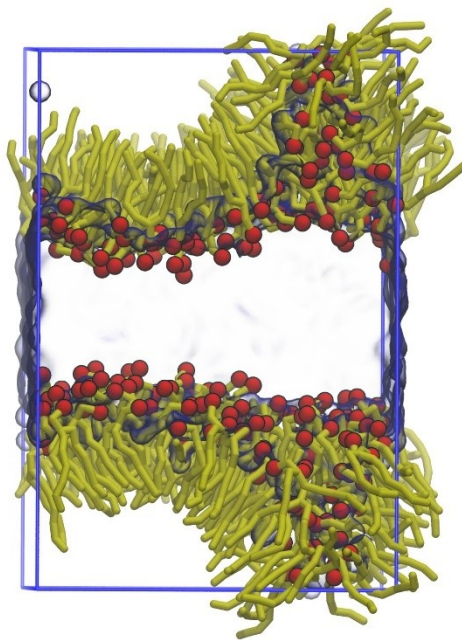

Figure S4. MD Snapshot from simulation using the pressure tensor method shows the unstable DPPC-lipid monolayer at molecular area  $\sim 50 \text{ \AA}^2$ . The color scheme is similar to Fig. S1.

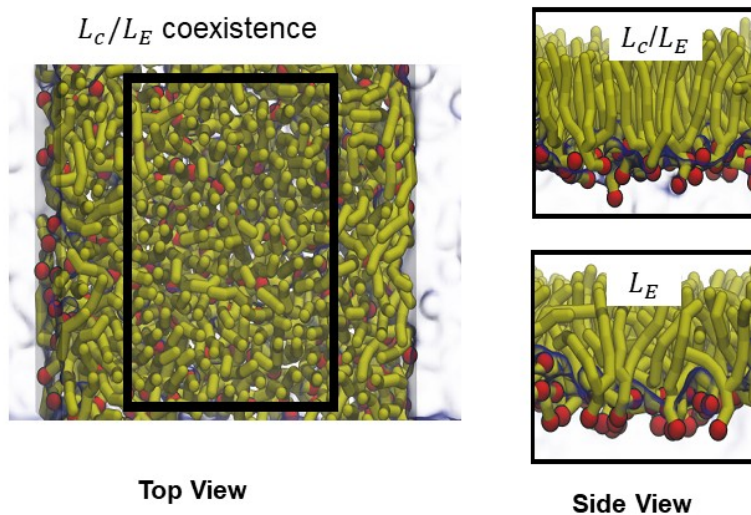

Figure S5. MD Snapshot from simulations using the osmotic pressure method clearly shows the phase coexistence region ( $L_C/L_E$  phase) in DPPC monolayers at 310K (molecular area  $\sim 60 \text{ \AA}^2$ ). Side view snapshots show the difference between a disordered  $L_E$  phase and quasi-ordered  $L_C/L_E$  phase. The color scheme is similar to Fig. S2.

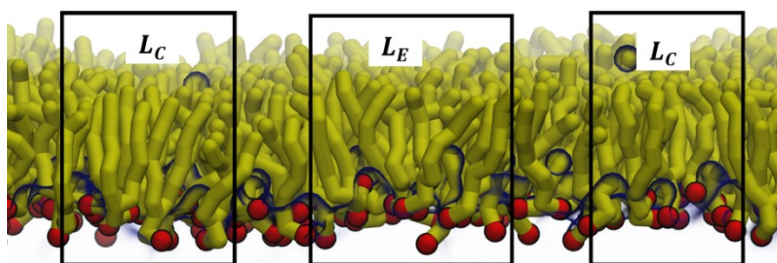

Figure S6. DPPC monolayer side view snapshot at 298K, from simulation using the osmotic pressure method, clearly show the coexistence of disordered ( $L_E$ ) and ordered ( $L_C$ ) phase close to phase transition point (molecular area  $\sim 65 \text{ \AA}^2$ ). The color scheme is similar to Fig. S2.

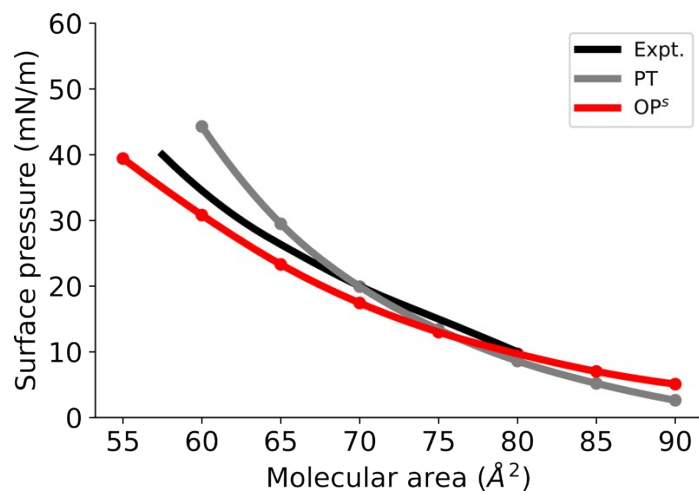

Figure S7. Surface pressure area isotherm of DPPC at 323 K. *Label scheme*: Expt. for experimental  $\Pi$ -A isotherm, PT for  $\Pi$ -A isotherm obtained by pressure tensor method and OP<sup>s</sup> for  $\Pi$ -A isotherm obtained by the current osmotic pressure method.

Table S1. Details about simulated lipid monolayer systems to obtain  $\Pi$ -A isotherms by pressure tensor method

| Molecular area (Å <sup>2</sup> ) | Lipids per Leaflet/Total | Box size in x and y directions (Å) |
|----------------------------------|--------------------------|------------------------------------|
| 50                               | 128/256                  | 80.00                              |
| 55                               | 128/256                  | 84.00                              |
| 60                               | 128/256                  | 87.60                              |
| 65                               | 128/256                  | 91.20                              |
| 70                               | 128/256                  | 94.60                              |
| 75                               | 128/256                  | 98.00                              |
| 80                               | 128/256                  | 101.20                             |
| 85                               | 128/256                  | 104.30                             |
| 90                               | 128/256                  | 107.30                             |

Table S2. Details about simulated lipid monolayer systems to obtain  $\Pi$ -A isotherms by Osmotic pressure method

| <b>Molecular area (<math>\text{\AA}^2</math>)</b> | <b>Length between virtual walls in x-direction (<math>\text{\AA}</math>)</b> | <b>Length in y-direction (<math>\text{\AA}</math>)</b> |
|---------------------------------------------------|------------------------------------------------------------------------------|--------------------------------------------------------|
| 50                                                | 80                                                                           | 80                                                     |
| 55                                                | 88                                                                           | 80                                                     |
| 60                                                | 96                                                                           | 80                                                     |
| 65                                                | 104                                                                          | 80                                                     |
| 70                                                | 112                                                                          | 80                                                     |
| 75                                                | 120                                                                          | 80                                                     |
| 80                                                | 128                                                                          | 80                                                     |
| 85                                                | 136                                                                          | 80                                                     |
| 90                                                | 144                                                                          | 80                                                     |

**Calculation of the semi-empirical coefficient ( $\xi$ )**

To calculate the semi-empirical coefficient, we first obtained the interfacial depth for lipids at large area per molecule (at infinite dilution). To do so, we implemented the following best exponential curve fitting function to fit the  $L_{z,int}$  vs. Molecular Area:  
The fitting function we implement is given as;

$$L_{z,int} = e^{a/x} + b. \quad (1)$$

Where,  $x$  is the molecular area. The fitting parameters are given as  $a$  and  $b$ . The asymptote of the function is given as,

$$L_{z,int} |_{x \rightarrow \infty} = b + 1. \quad (2)$$

The factor  $\xi$  for a given molecular area ( $x$ ) is;

$$\xi = \frac{L_{z,int} |_{x \rightarrow \infty}}{L_{z,int}}. \quad (3)$$

Below Fig. S8 provides an example of for the fitting of POPC at 298 K for the SPICA FF. Similar fits were carried out for rest of the lipids and the coefficients were calculated accordingly.

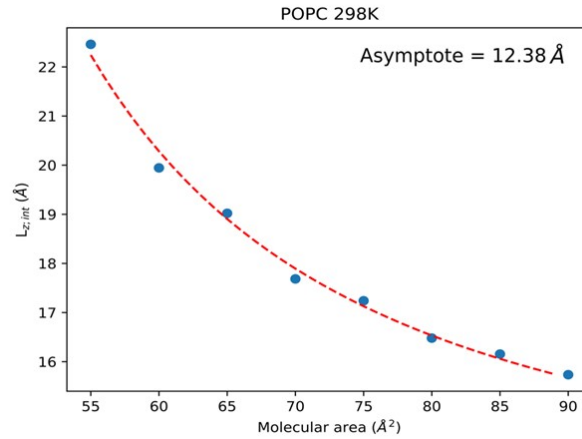

Figure S8. Fitting  $L_{z,int}$  data (blue dots) with the exponential function (eqn. (1); dotted red line) to calculate the asymptote, which is then implemented to obtain the semi-empirical coefficient ( $\xi$ ) for each molecular area of POPC lipid according to the eq.3.
